# Supplementary material for: Fed State Prior to Hemorrhagic Shock and Polytrauma in a Porcine Model Results in Altered Liver Transcriptomic Response
Source: PLoS One. 2014 Jun 17;9(6):e100088. doi: 10.1371/journal.pone.0100088 (PMC4061062; doi:10.1371/journal.pone.0100088)
Supplement: File S1 — List of genes differentially expressed between Carbohydrate Prefed and Fasted animals at Baseline and FR2, FR8 and FR20 vs. Baseline. (XLSX) [file pone.0100088.s001.xlsx]

## Sheet: Baseline
hgnc_symbol	pig_ensembl_gene_id	logFC	PValue	FDR	description
GCK	ENSSSCG00000016751	6.45527	5.42668e-13	6.2689e-09	glucokinase (hexokinase 4) [Source:HGNC Symbol;Acc:4195]
NADKD1	ENSSSCG00000016836	1.76624	2.17722e-07	0.00125756	NAD kinase domain containing 1 [Source:HGNC Symbol;Acc:26404]
ACTC1	ENSSSCG00000004803	-11.5778	2.11857e-06	0.00258905	actin	alpha	cardiac muscle 1 [Source:HGNC Symbol;Acc:143]
ASB5	ENSSSCG00000030395	-8.23064	1.29712e-06	0.00258905	ankyrin repeat and SOCS box containing 5 [Source:HGNC Symbol;Acc:17180]
DES	ENSSSCG00000020785	-6.15373	1.27298e-06	0.00258905	desmin [Source:HGNC Symbol;Acc:2770]
ENO3	ENSSSCG00000017904	-7.96598	2.13493e-06	0.00258905	enolase 3 (beta	muscle) [Source:HGNC Symbol;Acc:3354]
FLNC	ENSSSCG00000016578	-9.58477	1.88846e-06	0.00258905	filamin C	gamma [Source:HGNC Symbol;Acc:3756]
PDLIM3	ENSSSCG00000015796	-6.95713	1.12715e-06	0.00258905	PDZ and LIM domain 3 [Source:HGNC Symbol;Acc:20767]
TCAIM	ENSSSCG00000025739	1.5834	1.53056e-06	0.00258905	T cell activation inhibitor	mitochondrial [Source:HGNC Symbol;Acc:25241]
GPAM	ENSSSCG00000010631	1.9952	3.08854e-06	0.00324352	glycerol-3-phosphate acyltransferase	mitochondrial [Source:HGNC Symbol;Acc:24865]
TTC9	ENSSSCG00000020701	-6.70211	3.66069e-06	0.00352403	tetratricopeptide repeat domain 9 [Source:HGNC Symbol;Acc:20267]
ACTN2	ENSSSCG00000010144	-8.8616	4.21794e-06	0.00374813	actinin	alpha 2 [Source:HGNC Symbol;Acc:164]
CLIC5	ENSSSCG00000001711	-5.26598	6.80915e-06	0.00561852	chloride intracellular channel 5 [Source:HGNC Symbol;Acc:13517]
ANKRD23	ENSSSCG00000008200	-6.90243	9.0071e-06	0.00587856	ankyrin repeat domain 23 [Source:HGNC Symbol;Acc:24470]
CMYA5	ENSSSCG00000028800	-4.95336	9.15981e-06	0.00587856	cardiomyopathy associated 5 [Source:HGNC Symbol;Acc:14305]
SHROOM3	ENSSSCG00000008984	1.64402	7.90484e-06	0.00587856	shroom family member 3 [Source:HGNC Symbol;Acc:30422]
SPTB	ENSSSCG00000002277	-9.59339	8.56228e-06	0.00587856	spectrin	beta	erythrocytic [Source:HGNC Symbol;Acc:11274]
HK2	ENSSSCG00000008261	-9.13121	1.3703e-05	0.00833141	hexokinase 2 [Source:HGNC Symbol;Acc:4923]
PYGM	ENSSSCG00000013022	-6.7679	1.92179e-05	0.0111003	phosphorylase	glycogen	muscle [Source:HGNC Symbol;Acc:9726]
ANKRD1	ENSSSCG00000010461	-7.40005	2.02938e-05	0.0111635	ankyrin repeat domain 1 (cardiac muscle) [Source:HGNC Symbol;Acc:15819]
FGF21	ENSSSCG00000003140	3.80419	2.69169e-05	0.0111774	fibroblast growth factor 21 [Source:HGNC Symbol;Acc:3678]
FHL1	ENSSSCG00000012699	-4.75067	2.5738e-05	0.0111774	four and a half LIM domains 1 [Source:HGNC Symbol;Acc:3702]
MYBPC1	ENSSSCG00000000866	-6.94684	2.58891e-05	0.0111774	myosin binding protein C	slow type [Source:HGNC Symbol;Acc:7549]
MYBPC2	ENSSSCG00000003218	-8.47673	2.76097e-05	0.0111774	myosin binding protein C	fast type [Source:HGNC Symbol;Acc:7550]
NEB	ENSSSCG00000016397	-9.00508	2.80597e-05	0.0111774	nebulin [Source:HGNC Symbol;Acc:7720]
STAC3	ENSSSCG00000029471	-6.72718	2.51769e-05	0.0111774	SH3 and cysteine rich domain 3 [Source:HGNC Symbol;Acc:28423]
SYNPO2	ENSSSCG00000009111	-4.66234	2.32493e-05	0.0111774	synaptopodin 2 [Source:HGNC Symbol;Acc:17732]
TPM2	ENSSSCG00000005316	-3.98843	2.40863e-05	0.0111774	tropomyosin 2 (beta) [Source:HGNC Symbol;Acc:12011]
CAPN3	ENSSSCG00000004728	-5.23124	3.32e-05	0.0127842	calpain 3	(p94) [Source:HGNC Symbol;Acc:1480]
DENND2C	ENSSSCG00000012421	-4.55631	3.64515e-05	0.0135835	DENN/MADD domain containing 2C [Source:HGNC Symbol;Acc:24748]
CAP2	ENSSSCG00000029599	-6.48695	4.3549e-05	0.0157212	CAP	adenylate cyclase-associated protein	2 (yeast) [Source:HGNC Symbol;Acc:20039]
CKMT2	ENSSSCG00000014128	-6.38603	6.23129e-05	0.0210749	creatine kinase	mitochondrial 2 (sarcomeric) [Source:HGNC Symbol;Acc:1996]
OXCT1	ENSSSCG00000016863	-3.18087	6.56766e-05	0.0210749	3-oxoacid CoA transferase 1 [Source:HGNC Symbol;Acc:8527]
SRPK3	ENSSSCG00000024676	-7.23273	6.44536e-05	0.0210749	SRSF protein kinase 3 [Source:HGNC Symbol;Acc:11402]
TPM1	ENSSSCG00000004570	-3.21059	6.83075e-05	0.0213267	tropomyosin 1 (alpha) [Source:HGNC Symbol;Acc:12010]
FAM134B	ENSSSCG00000016792	-3.27271	7.68986e-05	0.0233772	family with sequence similarity 134	member B [Source:HGNC Symbol;Acc:25964]
CHKA	ENSSSCG00000012889	1.36999	8.3368e-05	0.024694	choline kinase alpha [Source:HGNC Symbol;Acc:1937]
VPS37B	ENSSSCG00000028889	-2.97154	9.01495e-05	0.0260352	vacuolar protein sorting 37 homolog B (S. cerevisiae) [Source:HGNC Symbol;Acc:25754]
PKIA	ENSSSCG00000006163	-3.59984	9.66146e-05	0.0265736	protein kinase (cAMP-dependent	catalytic) inhibitor alpha [Source:HGNC Symbol;Acc:9017]
ZSCAN16	ENSSSCG00000001198	-5.27009	9.54721e-05	0.0265736	zinc finger and SCAN domain containing 16 [Source:HGNC Symbol;Acc:20813]
PAQR7	ENSSSCG00000003551	2.28796	0.000103473	0.027798	progestin and adipoQ receptor family member VII [Source:HGNC Symbol;Acc:23146]
UNC45B	ENSSSCG00000017717	-5.92054	0.000132362	0.0347511	unc-45 homolog B (C. elegans) [Source:HGNC Symbol;Acc:14304]
CD36	ENSSSCG00000015405	-4.16863	0.00013948	0.0353615	CD36 molecule (thrombospondin receptor) [Source:HGNC Symbol;Acc:1663]
PAQR9	ENSSSCG00000011685	1.52652	0.000140809	0.0353615	progestin and adipoQ receptor family member IX [Source:HGNC Symbol;Acc:30131]
TSC22D1	ENSSSCG00000009422	-3.8428	0.000150809	0.037067	TSC22 domain family	member 1 [Source:HGNC Symbol;Acc:16826]
LMOD3	ENSSSCG00000011508	-7.97575	0.000164779	0.0395063	leiomodin 3 (fetal) [Source:HGNC Symbol;Acc:6649]
MYOM1	ENSSSCG00000003693	-2.68656	0.000167573	0.0395063	myomesin 1 [Source:HGNC Symbol;Acc:7613]
APOD	ENSSSCG00000011831	-5.31281	0.000180416	0.0403832	apolipoprotein D [Source:HGNC Symbol;Acc:612]
DIO2	ENSSSCG00000027643	3.3977	0.000181562	0.0403832	deiodinase	iodothyronine	type II [Source:HGNC Symbol;Acc:2884]
INHBA	ENSSSCG00000021865	1.84523	0.000192886	0.0403832	inhibin	beta A [Source:HGNC Symbol;Acc:6066]
P2RX5	ENSSSCG00000017868	-2.91615	0.000195763	0.0403832	purinergic receptor P2X	ligand-gated ion channel	5 [Source:HGNC Symbol;Acc:8536]
POPDC3	ENSSSCG00000004367	-7.66772	0.000190939	0.0403832	popeye domain containing 3 [Source:HGNC Symbol;Acc:17649]
RNF157	ENSSSCG00000017186	-3.36099	0.000184604	0.0403832	ring finger protein 157 [Source:HGNC Symbol;Acc:29402]
XIRP1	ENSSSCG00000011265	-9.04905	0.000186746	0.0403832	xin actin-binding repeat containing 1 [Source:HGNC Symbol;Acc:14301]
KIAA1467	ENSSSCG00000000619	1.18449	0.000200992	0.0407344	KIAA1467 [Source:HGNC Symbol;Acc:29288]
BVES	ENSSSCG00000004366	-3.51914	0.000217194	0.0417216	blood vessel epicardial substance [Source:HGNC Symbol;Acc:1152]
SGCB	ENSSSCG00000008833	-3.49235	0.000213297	0.0417216	sarcoglycan	beta (43kDa dystrophin-associated glycoprotein) [Source:HGNC Symbol;Acc:10806]
TMOD4	ENSSSCG00000006631	-9.67938	0.000218263	0.0417216	tropomodulin 4 (muscle) [Source:HGNC Symbol;Acc:11874]
TNNT1	ENSSSCG00000025353	-8.40676	0.00022031	0.0417216	troponin T type 1 (skeletal	slow) [Source:HGNC Symbol;Acc:11948]
NOSTRIN	ENSSSCG00000015923	1.23129	0.000232192	0.0419106	nitric oxide synthase trafficker [Source:HGNC Symbol;Acc:20203]
OLFM1	ENSSSCG00000029715	-3.85098	0.000227901	0.0419106	olfactomedin 1 [Source:HGNC Symbol;Acc:17187]
TCAP	ENSSSCG00000017500	-8.98779	0.00022965	0.0419106	titin-cap [Source:HGNC Symbol;Acc:11610]
TMEM110	ENSSSCG00000011452	-4.24735	0.000246611	0.0431674	transmembrane protein 110 [Source:HGNC Symbol;Acc:30526]
TMEM110-MUSTN1	ENSSSCG00000011452	-4.24735	0.000246628	0.0431674	TMEM110-MUSTN1 readthrough [Source:HGNC Symbol;Acc:38834]
NEXN	ENSSSCG00000003768	-4.28152	0.000258646	0.0437485	nexilin (F actin binding protein) [Source:HGNC Symbol;Acc:29557]
OTUB2	ENSSSCG00000002469	1.62431	0.000258544	0.0437485	OTU domain	ubiquitin aldehyde binding 2 [Source:HGNC Symbol;Acc:20351]
TACC2	ENSSSCG00000028063	-3.53447	0.000261309	0.0437485	transforming	acidic coiled-coil containing protein 2 [Source:HGNC Symbol;Acc:11523]
ART3	ENSSSCG00000008976	-7.42955	0.000290119	0.0478779	ADP-ribosyltransferase 3 [Source:HGNC Symbol;Acc:725]

## Sheet: FR2vBaseline
hgnc_symbol	pig_ensembl_gene_id	logFC	PValue	FDR	description
ACTC1	ENSSSCG00000004803	11.7198	6.33831e-06	0.0268643	actin	alpha	cardiac muscle 1 [Source:HGNC Symbol;Acc:143]
ANKRD1	ENSSSCG00000010461	8.29538	1.24529e-05	0.0268643	ankyrin repeat domain 1 (cardiac muscle) [Source:HGNC Symbol;Acc:15819]
ASB5	ENSSSCG00000030395	7.72737	1.65886e-05	0.0268643	ankyrin repeat and SOCS box containing 5 [Source:HGNC Symbol;Acc:17180]
DES	ENSSSCG00000020785	6.15224	5.91089e-06	0.0268643	desmin [Source:HGNC Symbol;Acc:2770]
ENO3	ENSSSCG00000017904	7.37263	1.86041e-05	0.0268643	enolase 3 (beta	muscle) [Source:HGNC Symbol;Acc:3354]
FLNC	ENSSSCG00000016578	8.86728	1.43858e-05	0.0268643	filamin C	gamma [Source:HGNC Symbol;Acc:3756]
HK2	ENSSSCG00000008261	9.7985	1.45423e-05	0.0268643	hexokinase 2 [Source:HGNC Symbol;Acc:4923]
SPTB	ENSSSCG00000002277	9.97874	1.22361e-05	0.0268643	spectrin	beta	erythrocytic [Source:HGNC Symbol;Acc:11274]
RNF122	ENSSSCG00000015834	2.72509	2.8132e-05	0.0349595	ring finger protein 122 [Source:HGNC Symbol;Acc:21147]
XIRP1	ENSSSCG00000011265	11.3305	3.02627e-05	0.0349595	xin actin-binding repeat containing 1 [Source:HGNC Symbol;Acc:14301]
MYBPC1	ENSSSCG00000000866	7.2603	3.91902e-05	0.0411569	myosin binding protein C	slow type [Source:HGNC Symbol;Acc:7549]
SRPK3	ENSSSCG00000024676	8.23119	4.60199e-05	0.0443018	SRSF protein kinase 3 [Source:HGNC Symbol;Acc:11402]
FHL1	ENSSSCG00000012699	5.06872	5.1979e-05	0.0461894	four and a half LIM domains 1 [Source:HGNC Symbol;Acc:3702]

## Sheet: FR8vBaseline
hgnc_symbol	pig_ensembl_gene_id	logFC	PValue	FDR	description
ACTC1	ENSSSCG00000004803	12.8265	1.39707e-06	0.0119429	actin	alpha	cardiac muscle 1 [Source:HGNC Symbol;Acc:143]
FLNC	ENSSSCG00000016578	10.3002	2.06768e-06	0.0119429	filamin C	gamma [Source:HGNC Symbol;Acc:3756]
DES	ENSSSCG00000020785	6.29339	5.16336e-06	0.0145646	desmin [Source:HGNC Symbol;Acc:2770]
ENO3	ENSSSCG00000017904	8.12955	5.25285e-06	0.0145646	enolase 3 (beta	muscle) [Source:HGNC Symbol;Acc:3354]
PDLIM3	ENSSSCG00000015796	6.91901	7.56473e-06	0.0145646	PDZ and LIM domain 3 [Source:HGNC Symbol;Acc:20767]
TTC9	ENSSSCG00000020701	7.20095	7.37275e-06	0.0145646	tetratricopeptide repeat domain 9 [Source:HGNC Symbol;Acc:20267]
CAP2	ENSSSCG00000029599	7.59856	2.05282e-05	0.0296428	CAP	adenylate cyclase-associated protein	2 (yeast) [Source:HGNC Symbol;Acc:20039]
TPM1	ENSSSCG00000004570	4.14228	1.89129e-05	0.0296428	tropomyosin 1 (alpha) [Source:HGNC Symbol;Acc:12010]
ASB5	ENSSSCG00000030395	7.41037	2.48179e-05	0.0318552	ankyrin repeat and SOCS box containing 5 [Source:HGNC Symbol;Acc:17180]
ANKRD1	ENSSSCG00000010461	7.79677	2.98917e-05	0.0326799	ankyrin repeat domain 1 (cardiac muscle) [Source:HGNC Symbol;Acc:15819]
FHL1	ENSSSCG00000012699	5.33786	3.11183e-05	0.0326799	four and a half LIM domains 1 [Source:HGNC Symbol;Acc:3702]
ACTN2	ENSSSCG00000010144	8.04753	5.00752e-05	0.0341525	actinin	alpha 2 [Source:HGNC Symbol;Acc:164]
CLIC5	ENSSSCG00000001711	5.23267	5.69114e-05	0.0341525	chloride intracellular channel 5 [Source:HGNC Symbol;Acc:13517]
GPD2	ENSSSCG00000015872	3.63323	4.51444e-05	0.0341525	glycerol-3-phosphate dehydrogenase 2 (mitochondrial) [Source:HGNC Symbol;Acc:4456]
NEXN	ENSSSCG00000003768	5.58375	4.7776e-05	0.0341525	nexilin (F actin binding protein) [Source:HGNC Symbol;Acc:29557]
OLFML2B	ENSSSCG00000006345	3.84337	6.50411e-05	0.0341525	olfactomedin-like 2B [Source:HGNC Symbol;Acc:24558]
PKIA	ENSSSCG00000006163	4.45811	4.12478e-05	0.0341525	protein kinase (cAMP-dependent	catalytic) inhibitor alpha [Source:HGNC Symbol;Acc:9017]
PYGM	ENSSSCG00000013022	6.87734	6.24463e-05	0.0341525	phosphorylase	glycogen	muscle [Source:HGNC Symbol;Acc:9726]
STAC3	ENSSSCG00000029471	7.2151	5.0922e-05	0.0341525	SH3 and cysteine rich domain 3 [Source:HGNC Symbol;Acc:28423]
SYNPO2	ENSSSCG00000009111	5.1034	3.78391e-05	0.0341525	synaptopodin 2 [Source:HGNC Symbol;Acc:17732]
TMEM110	ENSSSCG00000011452	5.41834	6.02521e-05	0.0341525	transmembrane protein 110 [Source:HGNC Symbol;Acc:30526]
TMEM110-MUSTN1	ENSSSCG00000011452	5.41834	6.02569e-05	0.0341525	TMEM110-MUSTN1 readthrough [Source:HGNC Symbol;Acc:38834]
CAPN3	ENSSSCG00000004728	5.73332	7.20285e-05	0.0361771	calpain 3	(p94) [Source:HGNC Symbol;Acc:1480]
TPM2	ENSSSCG00000005316	4.26689	8.12704e-05	0.0391181	tropomyosin 2 (beta) [Source:HGNC Symbol;Acc:12011]
SYNPO2L	ENSSSCG00000010303	11.5122	8.77565e-05	0.0405505	synaptopodin 2-like [Source:HGNC Symbol;Acc:23532]
ANKRD23	ENSSSCG00000008200	6.50656	9.97556e-05	0.0440881	ankyrin repeat domain 23 [Source:HGNC Symbol;Acc:24470]
OLFM1	ENSSSCG00000029715	4.75009	0.000106862	0.0440881	olfactomedin 1 [Source:HGNC Symbol;Acc:17187]
SRPK3	ENSSSCG00000024676	7.69105	0.000103565	0.0440881	SRSF protein kinase 3 [Source:HGNC Symbol;Acc:11402]
MYBPC2	ENSSSCG00000003218	8.55973	0.000113158	0.0450761	myosin binding protein C	fast type [Source:HGNC Symbol;Acc:7550]

## Sheet: FR20vBaseline
hgnc_symbol	pig_ensembl_gene_id	logFC	PValue	FDR	description
ASB5	ENSSSCG00000030395	8.77426	1.2843e-06	0.0075244	ankyrin repeat and SOCS box containing 5 [Source:HGNC Symbol;Acc:17180]
DES	ENSSSCG00000020785	6.71982	1.3027e-06	0.0075244	desmin [Source:HGNC Symbol;Acc:2770]
FLNC	ENSSSCG00000016578	10.1218	2.73478e-06	0.00789804	filamin C	gamma [Source:HGNC Symbol;Acc:3756]
PDLIM3	ENSSSCG00000015796	7.28898	2.43823e-06	0.00789804	PDZ and LIM domain 3 [Source:HGNC Symbol;Acc:20767]
ACTC1	ENSSSCG00000004803	11.8542	5.01294e-06	0.00976713	actin	alpha	cardiac muscle 1 [Source:HGNC Symbol;Acc:143]
CHKA	ENSSSCG00000012889	-2.27116	6.76394e-06	0.00976713	choline kinase alpha [Source:HGNC Symbol;Acc:1937]
STAC3	ENSSSCG00000029471	8.17674	5.9688e-06	0.00976713	SH3 and cysteine rich domain 3 [Source:HGNC Symbol;Acc:28423]
TTC9	ENSSSCG00000020701	7.21335	6.39109e-06	0.00976713	tetratricopeptide repeat domain 9 [Source:HGNC Symbol;Acc:20267]
TPM2	ENSSSCG00000005316	4.69315	1.36907e-05	0.0175728	tropomyosin 2 (beta) [Source:HGNC Symbol;Acc:12011]
ENO3	ENSSSCG00000017904	7.46861	1.55695e-05	0.0179859	enolase 3 (beta	muscle) [Source:HGNC Symbol;Acc:3354]
CMYA5	ENSSSCG00000026098	5.19116	2.33103e-05	0.0222763	cardiomyopathy associated 5 [Source:HGNC Symbol;Acc:14305]
FHL1	ENSSSCG00000012699	5.31931	2.50685e-05	0.0222763	four and a half LIM domains 1 [Source:HGNC Symbol;Acc:3702]
PKIA	ENSSSCG00000006163	4.52927	2.34504e-05	0.0222763	protein kinase (cAMP-dependent	catalytic) inhibitor alpha [Source:HGNC Symbol;Acc:9017]
SYNPO2	ENSSSCG00000009111	5.15197	2.79346e-05	0.0230501	synaptopodin 2 [Source:HGNC Symbol;Acc:17732]
ACTN2	ENSSSCG00000010144	8.09927	3.75698e-05	0.0241114	actinin	alpha 2 [Source:HGNC Symbol;Acc:164]
HK2	ENSSSCG00000008261	9.05737	3.69835e-05	0.0241114	hexokinase 2 [Source:HGNC Symbol;Acc:4923]
TMEM110	ENSSSCG00000011452	5.51261	3.45331e-05	0.0241114	transmembrane protein 110 [Source:HGNC Symbol;Acc:30526]
TMEM110-MUSTN1	ENSSSCG00000011452	5.51261	3.4536e-05	0.0241114	TMEM110-MUSTN1 readthrough [Source:HGNC Symbol;Acc:38834]
SPTB	ENSSSCG00000002277	9.05811	5.01412e-05	0.0304858	spectrin	beta	erythrocytic [Source:HGNC Symbol;Acc:11274]
CKMT2	ENSSSCG00000014128	7.10414	5.45878e-05	0.0315299	creatine kinase	mitochondrial 2 (sarcomeric) [Source:HGNC Symbol;Acc:1996]
CLIC5	ENSSSCG00000001711	5.14454	6.19362e-05	0.0317372	chloride intracellular channel 5 [Source:HGNC Symbol;Acc:13517]
DENND2C	ENSSSCG00000006755	4.97969	6.31887e-05	0.0317372	DENN/MADD domain containing 2C [Source:HGNC Symbol;Acc:24748]
OLFM3	ENSSSCG00000006858	4.458	5.95925e-05	0.0317372	olfactomedin 3 [Source:HGNC Symbol;Acc:17990]
GCK	ENSSSCG00000016751	-5.51568	7.67631e-05	0.0369487	glucokinase (hexokinase 4) [Source:HGNC Symbol;Acc:4195]
NEXN	ENSSSCG00000003768	5.28876	7.9979e-05	0.0369567	nexilin (F actin binding protein) [Source:HGNC Symbol;Acc:29557]
ANKRD1	ENSSSCG00000010461	7.15356	8.48172e-05	0.037685	ankyrin repeat domain 1 (cardiac muscle) [Source:HGNC Symbol;Acc:15819]
MYO18B	ENSSSCG00000009957	9.57453	8.83989e-05	0.0378216	myosin XVIIIB [Source:HGNC Symbol;Acc:18150]
CAP2	ENSSSCG00000001068	6.72624	9.66057e-05	0.0397656	CAP	adenylate cyclase-associated protein	2 (yeast) [Source:HGNC Symbol;Acc:20039]
JPH2	ENSSSCG00000007369	4.7407	9.9827e-05	0.0397656	junctophilin 2 [Source:HGNC Symbol;Acc:14202]
SRPK3	ENSSSCG00000024676	7.61443	0.000126376	0.0486634	SRSF protein kinase 3 [Source:HGNC Symbol;Acc:11402]
